# Supplementary material for: Performance of contemporary cardiovascular risk stratification scores in Brazil: an evaluation in the ELSA-Brasil study
Source: HighWire-hosted journal article supplement (doi:10.1136/openhrt-2024-002762), 2024-06-01
Supplement: openhrt-2024-002762supp001_data_supplement.pdf [file openhrt-2024-002762supp001_data_supplement.pdf]

## Supplementary Material

### Performance of Contemporary Cardiovascular Risk Stratification Scores in Brazil: An Evaluation in the ELSA-Brasil Study

Aline Pedroso Camargos, MS;<sup>1,2</sup> Sandhi Maria Barreto, MD, PhD;<sup>3</sup> Luisa Campos Caldeira Brant, MD, PhD;<sup>3</sup> Antonio Luiz P. Ribeiro, MD, PhD;<sup>4,5</sup> Lovedeep S. Dhingra, MBBS;<sup>1</sup> Arya Aminorroaya, MD, MPH;<sup>1</sup> Marcio Sommer Bitterncourt, MD, PhD;<sup>6</sup> Roberta Carvalho Figueiredo, PhD;<sup>2</sup> Rohan Khera, MD, MS<sup>1,7,8,9 \*</sup>

<sup>1</sup> Section of Cardiovascular Medicine, Department of Internal Medicine, Yale School of Medicine, New Haven, Connecticut, USA.

<sup>2</sup> Universidade Federal de Sao Joao del-Rei, Divinopolis, MG, Brazil.

<sup>3</sup> Universidade Federal de Minas Gerais/Medical School and Clinical Hospital, Belo Horizonte, MG, Brazil.

<sup>4</sup> Departamento de Clinica Medica, Faculdade de Medicina, Universidade Federal de Minas Gerais, Belo Horizonte, MG, Brasil.

<sup>5</sup> Centro de Telessaude, Hospital das Clínicas & Departamento de Clinica Medica, Faculdade de Medicina, Universidade Federal de Minas Gerais, Belo Horizonte, MG Brazil.

<sup>6</sup> Department of Medicine, University of Pittsburgh, Pittsburgh, Pennsylvania, USA.

<sup>7</sup> Center for Outcomes Research and Evaluation (CORE), Yale New Haven Hospital, New Haven, Connecticut, USA.

<sup>8</sup> Section of Health Informatics, Department of Biostatistics, Yale School of Public Health, New Haven, Connecticut, USA.

<sup>9</sup> Section of Biomedical Informatics and Data Science, Yale School of Medicine, New Haven, Connecticut, USA.

## SUMMARY

|                                                                                                                                                                                                                                                        |    |
|--------------------------------------------------------------------------------------------------------------------------------------------------------------------------------------------------------------------------------------------------------|----|
| 1. Method used to lower individual 10-year risk to correspond to lower length of follow-up.....                                                                                                                                                        | 3  |
| 2. ELSA- Brasil definition of diabetes mellitus, systolic blood pressure, total cholesterol, high-density lipoprotein cholesterol, low-density lipoprotein cholesterol, and body mass index.....                                                       | 3  |
| 3. Supplementary Table 1: Age, laboratory parameters for risk score calculation, risk factors included in the model, outcomes measured, and risk classification for each CVD risk score included in the study.....                                     | 4  |
| 4. Supplementary Table 2: Baseline characteristics stratified by race and sex. ELSA-Brasil (2008), N=12,155.....                                                                                                                                       | 5  |
| 5. Supplementary Table 3: Frequency of cardiovascular events, cumulative incidences, and incidence rates in the total study population and stratified by race. ELSA-Brasil (2008-2013). N= 12,155.....                                                 | 6  |
| 6. Supplementary Table 4: Sensitivity analysis limited to the population not taking statins, without Diabetes Mellitus and LDL-c between 70-190mg/dL. ELSA-Brasil (2008-2013).....                                                                     | 7  |
| 7. Supplementary Table 5: Discrimination and Calibration of Framingham General Risk, Pooled Cohort Equations, World Health Organization, Globorisk-LAC and SCORE2 for the total study population stratified by education. ELSA-Brasil (2008-2013)..... | 8  |
| 8. Supplementary Figure 1: Calibration for the Framingham General Risk, Pooled Cohort Equations, World Health Organization CVD score, Globorisk-LAC and SCORE2 for Black and "Pardo" men by risk categories. ELSA-Brasil (2008-2013). N=2,379.....     | 9  |
| 9. Supplementary Figure 2: Calibration for the Framingham General Risk, Pooled Cohort Equations, World Health Organization CVD score, Globorisk-LAC and SCORE2 for White men by risk categories. ELSA-Brasil (2008-2013). N=2,868.....                 | 10 |
| 10. Supplementary Figure 3: Calibration for the Framingham General Risk, Pooled Cohort Equations, World Health Organization CVD score, Globorisk-LAC and SCORE2 for Black and Pardo women by risk categories. ELSA-Brasil (2008-2013). N=3,016.....    | 11 |
| 11. Supplementary Figure 4: Calibration for the Framingham General Risk, Pooled Cohort Equations, World Health Organization CVD score, Globorisk-LAC and SCORE2 for White women by risk categories. ELSA-Brasil (2008-2013). N= 3,460.....             | 12 |
| 12. Supplementary Figure 5: Calibration of PCE African American vs. PCE White-American equations for Black/"Pardo" men and women. ELSA-Brasil (2008-2013).....                                                                                         | 13 |

### 1. Method used to lower individual 10-year risk to correspond to lower length of follow-up:

For each subject with <10 years of follow-up, including those who died, we lowered their 10-year risk estimate to correspond to their length of follow-up using an exponential survival function to scale the risk score. If A10 denotes the 10-year estimation according to the risk score, then the 1-year risk estimation is  $A1 = -\ln(1-A10)/10$ . So, for a person with 4.2 years of follow-up,  $A4.2 = 1 - \exp(-A1 \times 4.2)$ .

$$1 \text{ YEAR RISK} = -\frac{\ln(1 - 10 \text{ YEAR RISK})}{10}$$

$$4 \text{ YEAR RISK} = 1 - \exp(-1 \text{ YEAR RISK} \times 4)$$

### 2. ELSA- Brasil definition of diabetes mellitus, systolic blood pressure, total cholesterol, high-density lipoprotein cholesterol, low-density lipoprotein cholesterol, and body mass index:

Diabetes Mellitus was defined as the report of a medical diagnosis, report of using hypoglycemic agents or insulin, fasting serum glucose  $\geq 126$  mg/dL, glycated hemoglobin (HbA1c) level  $\geq 6.5\%$ , or a 2-hour oral glucose tolerance test  $\geq 200$  mg/dL measured twice. Systolic blood pressure was measured at the right arm after 5 minutes of rest, with the participant sitting in a quiet, temperature-controlled room (20-24°C) using a validated device (Omron HEM 705). Three measurements were taken at intervals of 1 minute each. The mean of the second and third measures was used as casual SBP. Total cholesterol and high-density lipoprotein cholesterol were determined by the enzymatic colorimetric method. Low-density lipoprotein cholesterol was calculated by the Friedewald equation or directly with triglyceride  $> 400$  mg/dL. Body mass index (BMI) was calculated by anthropometric measurements and classified as normal weight ( $\leq 24.9$  kg/m<sup>2</sup>), overweight (between 25 and 29.9 kg/m<sup>2</sup>), or obesity ( $\geq 30$  kg/m<sup>2</sup>).

**Supplementary Table 1: Age, laboratory parameters for risk score calculation, risk factors included in the model, outcomes measured, and risk classification for each CVD risk score included in the study.**

| CVD Risk Score | Age group | Lab. Parameters                                           | Risk factors                                                     | 10-year outcomes                                                  | Risk Classification                                                          |
|----------------|-----------|-----------------------------------------------------------|------------------------------------------------------------------|-------------------------------------------------------------------|------------------------------------------------------------------------------|
| FGR            | 40-80     | SBP: 90-200mmHg<br>TC: 130-320mg/dL<br>HDL-C: 20-100mg/dL | Age, smoking, SBP, history of DM, hypertension treatment and TC. | Coronary, cerebrovascular, and peripheral arterial disease and HF | ≥ 20.0% (high)                                                               |
| PCE            | 40-79     | SBP: 90-200mmHg<br>TC: 130-320mg/dL<br>HDL-C: 20-100mg/dL | Age, sex, smoking status, SBP, history of DM and TC.             | Fatal CHD; fatal or nonfatal MI or stroke                         | ≤5% (low)<br>5-7.5% (borderline)<br>7.5-20% (intermediate)<br>≥ 20.0% (high) |
| WHO            | 40-80     | SBP: 90-200mmHg<br>TC: 140-300mg/dL<br>HDL-C: 20-100mg/dL | Age, sex, smoking status, SBP, history of DM and TC.             | Fatal and non-fatal MI or stroke                                  | ≤5% (low)<br>5-10% (moderate)<br>10-20% (high)<br>≥ 20.0% (very high)        |
| Globorisk-LAC  | 40-75     | SBP: 70–270mmHg<br>TC: 1.75–20mmol/l<br>BMI: 10–80kg/m2   | Age, sex, smoking status, SBP, DM, BMI                           | Fatal/non-fatal CHD and stroke                                    | ≤5% (low)<br>5-10% (moderate)<br>10-20% (high)<br>≥ 20.0% (very high)        |
| SCORE2         | 40-69     | SBP: 90-200mmHg<br>TC: 130-320mg/dL<br>HDL-C: 20-100mg/dL | Age, sex, smoking status, history of DM, SBP, TC and HDL-c       | Fatal and non-fatal MI or stroke                                  | ≤5% (low)<br>5-10% (moderate)<br>≥ 10.0% (high)                              |

SBP: systolic blood pressure; DM: diabetes mellitus; TC: total cholesterol; HDL-C: high-density lipoprotein cholesterol; MI: myocardial infarction; CHD: coronary heart disease; BMI: body mass index.

Supplementary Table 2: Baseline characteristics stratified by race and sex. ELSA-Brasil (2008), N=12,155.

| N                                             | White                 |                      | "Pardo"               |                      | Black                 |                      | Other                 |                      |
|-----------------------------------------------|-----------------------|----------------------|-----------------------|----------------------|-----------------------|----------------------|-----------------------|----------------------|
|                                               | Men<br>2868           | Women<br>3460        | Men<br>1615           | Women<br>1803        | Men<br>764            | Women<br>1213        | Men<br>186            | Women<br>246         |
| Age, mean (SD)                                | 53.7 (8.7)            | 53.4 (8.2)           | 51.8 (7.7)            | 52.6 (7.7)           | 52.5 (7.9)            | 52.4 (7.8)           | 54.9 (8.8)            | 54.8 (8.1)           |
| Education ≤Middle School, N (%)               | 286 (10.0)            | 173 (5.0)            | 357 (22.1)            | 221 (12.3)           | 238 (31.2)            | 198 (16.3)           | 49 (26.3)             | 24 (9.8)             |
| Smoking, N (%)                                | 377 (13.1)            | 444 (12.8)           | 265 (16.4)            | 213 (11.8)           | 133 (17.4)            | 169 (13.9)           | 32 (17.2)             | 21 (8.5)             |
| Diabetes, N (%)                               | 478 (16.7)            | 356 (10.3)           | 325 (20.1)            | 247 (13.7)           | 199 (26.0)            | 253 (20.9)           | 46 (24.7)             | 41 (16.7)            |
| Statin Use, N (%)                             | 378 (13.2)            | 472 (13.6)           | 106 (6.6)             | 178 (9.9)            | 51 (6.7)              | 131 (10.8)           | 21 (11.3)             | 49 (19.9)            |
| Antihypertensive, N (%)                       | 777 (27.1)            | 773 (22.3)           | 412 (25.5)            | 508 (28.2)           | 255 (33.4)            | 474 (39.1)           | 49 (26.3)             | 72 (29.3)            |
| SBP mmHg, mean (SD)                           | 123.2 (15.4)          | 115.5 (15.5)         | 127.3 (17.0)          | 119.2 (16.8)         | 132.4 (18.9)          | 123.4 (18.3)         | 126.2 (17.7)          | 117.3 (16.8)         |
| BMI Kg/m <sup>2</sup> , mean (SD)             | 26.9 (4.2)            | 26.5 (4.9)           | 26.7 (4.2)            | 27.3 (4.8)           | 27.3 (4.4)            | 28.4 (5.5)           | 26.4 (3.9)            | 25.7 (4.3)           |
| Total Cholesterol mg/dL, mean (SD)            | 199.2 (41.1)          | 204.6 (38.2)         | 201.0 (42.4)          | 206.3 (40.2)         | 204.0 (44.8)          | 200.7 (41.4)         | 203.5 (43.8)          | 204.7 (37.7)         |
| HDL-Cholesterol mg/dL, mean (SD)              | 48.0 (10.5)           | 58.7 (13.3)          | 48.2 (11.5)           | 57.2 (13.0)          | 51.3 (13.0)           | 58.4 (13.4)          | 50.4 (12.8)           | 58.8 (13.5)          |
| Predicted Risk Across Scores                  |                       |                      |                       |                      |                       |                      |                       |                      |
| FGR 10-year risk, median [IQR]                | 5.74<br>[2.72, 11.71] | 1.70<br>[0.76, 3.98] | 7.20<br>[4.46, 12.30] | 2.48<br>[0.89, 6.44] | 8.79<br>[5.01, 15.36] | 2.89<br>[0.94, 8.23] | 8.30<br>[3.54, 14.78] | 2.02<br>[0.89, 4.49] |
| PCE-race specific 10-year risk, median [IQR]  | 5.75<br>[2.72, 11.64] | 1.70<br>[0.76, 3.94] | 7.20<br>[4.46, 12.26] | 2.46<br>[0.89, 6.44] | 8.81<br>[4.99, 15.19] | 2.90<br>[0.94, 8.23] | 8.30<br>[3.54, 14.09] | 2.02<br>[0.89, 4.49] |
| PCE-White American 10-year risk, median [IQR] | 5.75<br>[2.72, 11.64] | 1.70<br>[0.76, 3.94] | 5.37<br>[2.55, 10.53] | 1.76<br>[0.80, 4.06] | 6.37<br>[2.82, 12.60] | 1.95<br>[0.82, 4.88] | 8.30<br>[3.54, 14.09] | 2.02<br>[0.89, 4.49] |
| WHO 10-year risk, median [IQR]                | 3.98<br>[2.48, 6.35]  | 2.58<br>[1.59, 4.09] | 3.76<br>[2.48, 5.82]  | 2.54<br>[1.65, 4.02] | 4.36<br>[2.68, 6.76]  | 2.72<br>[1.73, 4.40] | 4.72<br>[3.17, 6.84]  | 2.83<br>[1.84, 4.38] |
| Globorisk-LAC 10-year risk, median [IQR]      | 5.80<br>[3.80, 9.09]  | 3.17<br>[2.00, 5.23] | 6.03<br>[3.84, 9.99]  | 3.39<br>[2.13, 5.79] | 7.45<br>[4.45, 12.38] | 3.76<br>[2.22, 6.94] | 7.27<br>[4.39, 10.90] | 3.68<br>[2.23, 6.19] |

|                                            |                      |                      |                      |                      |                      |                      |                      |                      |
|--------------------------------------------|----------------------|----------------------|----------------------|----------------------|----------------------|----------------------|----------------------|----------------------|
| SCORE2 low-risk 10-year risk, median [IQR] | 3.85<br>[2.39, 6.29] | 1.93<br>[1.08, 3.41] | 3.80<br>[2.33, 6.10] | 1.98<br>[1.14, 3.52] | 4.30<br>[2.54, 7.01] | 2.10<br>[1.15, 4.02] | 4.86<br>[2.83, 7.08] | 2.26<br>[1.23, 3.75] |
| CVD Events, N (%)                          | 47 (1.6)             | 16 (0.5)             | 29 (1.8)             | 13 (0.7)             | 22 (2.9)             | 18 (1.5)             | 1 (0.5)              | 3 (1.2)              |

SD. Standard Deviation; SBP. Systolic Blood Pressure; BMI. Body Mass Index; HDL. High-density Lipoprotein Cholesterol; IQR. interquartile range. FGR. Framingham General Risk. PCE. Pooled Cohort Equations. PCE-w. WHO. World Health Organization recalibrated score.

**Supplementary Table 3: Frequency of cardiovascular events, cumulative incidences, and incidence rates in the total study population and stratified by race. ELSA-Brasil (2008-2013). N= 12,155.**

|                                          | Total            | White            | "Pardo"          | Black            | Other            |
|------------------------------------------|------------------|------------------|------------------|------------------|------------------|
| Population, N                            | 12155            | 6328             | 3418             | 1977             | 432              |
| Events, n                                | 149              | 63               | 42               | 40               | 4                |
| Non-fatal MI, N (%)                      | 47 (31.5)        | 28(44.4)         | 15(35.7)         | 7(17.5)          | 2(50.0)          |
| Non-fatal stroke, N (%)                  | 49 (32.9)        | 19(30.2)         | 17(40.5)         | 18(45.0)         | 2(50.0)          |
| Heart Failure, N (%)                     | 24 (16.1)        | 10(15.9)         | 7(16.7)          | 10(25.0)         | 0                |
| Peripheral Arterial Disease, N (%)       | 11 (7.4)         | 3(4.8)           | 6(14.3)          | 4(10.0)          | 0                |
| Fatal CVD events, N (%)                  | 33 (22.1)        | 9(14.3)          | 12(28.6)         | 12(30.0)         | 0                |
| Cumulative Incidence CVD Events* (%)     | 149 (1.23)       | 63 (1.0)         | 42 (1.2)         | 40 (2.2)         | 4 (0.9)          |
| Incidence rate/1000 person-years (95%CI) | 2.56 (2.16-3.03) | 2.17 (1.68-2.80) | 2.57 (1.87-3.53) | 3.88 (2.76-5.46) | 2.11 (0.79-5.62) |

\*Number of events (coronary heart disease death, nonfatal myocardial infarction, or fatal or nonfatal ischemic stroke) divided by number of individuals. Differences in sums are due to individuals presenting multiple events.

**Supplementary Table 4: Sensitivity analysis limited to the population not taking statins, without Diabetes Mellitus and LDL-C between 70-190mg/dL. ELSA-Brasil (2008-2013).**

|                    |               | Total Population<br>(N = 8,537) | MEN (N = 3,686)  |                   | WOMEN (N = 4,851) |                   |
|--------------------|---------------|---------------------------------|------------------|-------------------|-------------------|-------------------|
|                    |               |                                 | White            | Black/"Pardo"     | White             | Black/"Pardo"     |
| AUC (95% CI)       | FGR           | 0.76 (0.70-0.82)                | 0.79 (0.71-0.86) | 0.85 (0.77-0.93)  | 0.59 (0.43-0.74)  | 0.76 (0.66-0.86)  |
|                    | PCE           | 0.74 (0.68-0.81)                | 0.79 (0.70-0.87) | 0.85 (0.76-0.93)  | 0.59 (0.43-0.74)  | 0.73 (0.62-0.84)  |
|                    | PCE-w         | 0.74 (0.68-0.80)                | 0.79 (0.71-0.86) | 0.83 (0.73-0.93)  | 0.59 (0.42-0.75)  | 0.72 (0.60-0.84)  |
|                    | WHO           | 0.74 (0.67-0.80)                | 0.77 (0.69-0.86) | 0.81 (0.70-0.93)  | 0.55 (0.37-0.73)  | 0.74 (0.63-0.86)  |
|                    | GloboRisk-LAC | 0.73 (0.67-0.79)                | 0.73 (0.63-0.82) | 0.79 (0.67-0.91)  | 0.59 (0.71-0.77)  | 0.76 (0.64-0.88)  |
|                    | SCORE2        | 0.74 (0.67-0.80)                | 0.80 (0.72-0.87) | 0.83 (0.72-0.93)  | 0.55 (0.36-0.73)  | 0.73 (0.62-0.85)  |
| P/O Ratio (95% CI) | FGR           | 2.13 (1.78-2.48)                | 3.66 (2.96-4.36) | 3.26 (2.76-3.76)  | 2.58 (2.19-2.97)  | 1.54 (1.29-1.79)  |
|                    | PCE           | 2.31 (1.92-2.70)                | 3.47 (2.97-3.97) | 5.73 (5.03-6.43)  | 2.31 (1.92-2.70)  | 2.33 (1.94-2.72)  |
|                    | PCE-w         | 2.00 (1.64-2.36)                | 3.47 (2.97-3.97) | 3.28 (2.79-3.77)  | 2.31 (1.92-2.70)  | 1.27 (1.05-1.49)  |
|                    | WHO           | 1.96 (1.63-2.29)                | 1.85 (1.53-2.17) | 1.32 (0.96-1.68)* | 1.90 (1.33-2.47)  | 1.25 (0.87-1.63)* |
|                    | GloboRisk-LAC | 2.71 (2.22-3.20)                | 1.57 (1.19-1.95) | 1.54 (1.29-1.79)  | 3.29 (2.79-3.79)  | 1.57 (1.31-1.83)  |
|                    | SCORE2        | 1.78 (1.48-2.08)                | 1.41 (1.17-1.65) | 1.15 (0.95-1.35)* | 1.59 (1.32-1.86)  | 0.68 (0.56-0.80)  |

FGR. Framingham General Risk. PCE. Pooled Cohort Equations. PCE-w. Pooled Cohort White-American Equation. WHO. World Health Organization recalibrated score. SCORE2. score from the European Society of Cardiology (2021). P/O. Predicted to Observed. AUC. Area under the Receiver Operating Characteristic Curve. 95% CI. Confidence intervals at 95%. \*Groenensby-Borgman  $\chi^2 < 20$  and  $p > 0.05$ .



**Supplementary Table 5: Discrimination and Calibration of Framingham General Risk, Pooled Cohort Equations, World Health Organization, Globorisk-LAC and SCORE2 for the total study population stratified by education. ELSA-Brasil (2008-2013).**

|           |               | College          | High School       | Middle School    |
|-----------|---------------|------------------|-------------------|------------------|
| AUC       | FGR           | 0.75 (0.67-0.83) | 0.77 (0.71-0.82)  | 0.74 (0.66-0.82) |
|           | PCE           | 0.73 (0.64-0.81) | 0.77 (0.70-0.83)  | 0.72 (0.64-0.81) |
|           | PCE-w         | 0.72 (0.63-0.80) | 0.78 (0.72-0.84)  | 0.73 (0.64-0.82) |
|           | WHO           | 0.71 (0.62-0.80) | 0.77 (0.70-0.83)  | 0.74 (0.65-0.83) |
|           | Globorisk-LAC | 0.71 (0.62-0.80) | 0.76 (0.69-0.82)  | 0.73 (0.64-0.82) |
|           | SCORE2        | 0.72 (0.63-0.81) | 0.77 (0.71-0.83)  | 0.75 (0.66-0.84) |
| P/O Ratio | FGR           | 3.21 (2.73-3.69) | 2.09 (1.72-2.46)  | 2.08 (1.71-2.45) |
|           | PCE           | 3.72 (3.19-4.25) | 2.61 (2.17-3.05)  | 2.20 (1.82-2.58) |
|           | PCE-w         | 3.43 (2.95-3.91) | 2.20 (1.82-2.58)  | 1.75 (1.44-2.06) |
|           | WHO           | 1.69 (1.39-1.99) | 1.07 (0.88-1.26)* | 0.84 (0.69-0.99) |
|           | Globorisk-LAC | 3.10 (2.65-3.55) | 2.37 (1.96-2.78)  | 1.88 (1.55-2.21) |
|           | SCORE2        | 1.34 (1.11-1.57) | 0.88 (0.73-1.03)* | 0.72 (0.59-0.85) |

FGR. Framingham General Risk. PCE. Pooled Cohort Equations. PCE-w. Pooled Cohort White-American Equation. WHO. World Health Organization recalibrated score. SCORE2. score from the European Society of Cardiology (2021). P/O. Predicted to Observed. AUC. Area under the Receiver Operating Characteristic Curve. 95% CI. Confidence intervals at 95%. \*Groenensby-Borgman  $\chi^2 < 20$  and  $p > 0.05$ .

**Supplementary Figure 1: Calibration for the Framingham General Risk, Pooled Cohort Equations, World Health Organization CVD score, Globorisk-LAC and SCORE2 for Black and “Pardo” men by risk categories. ELSA-Brasil (2008-2013). N=2,379.**

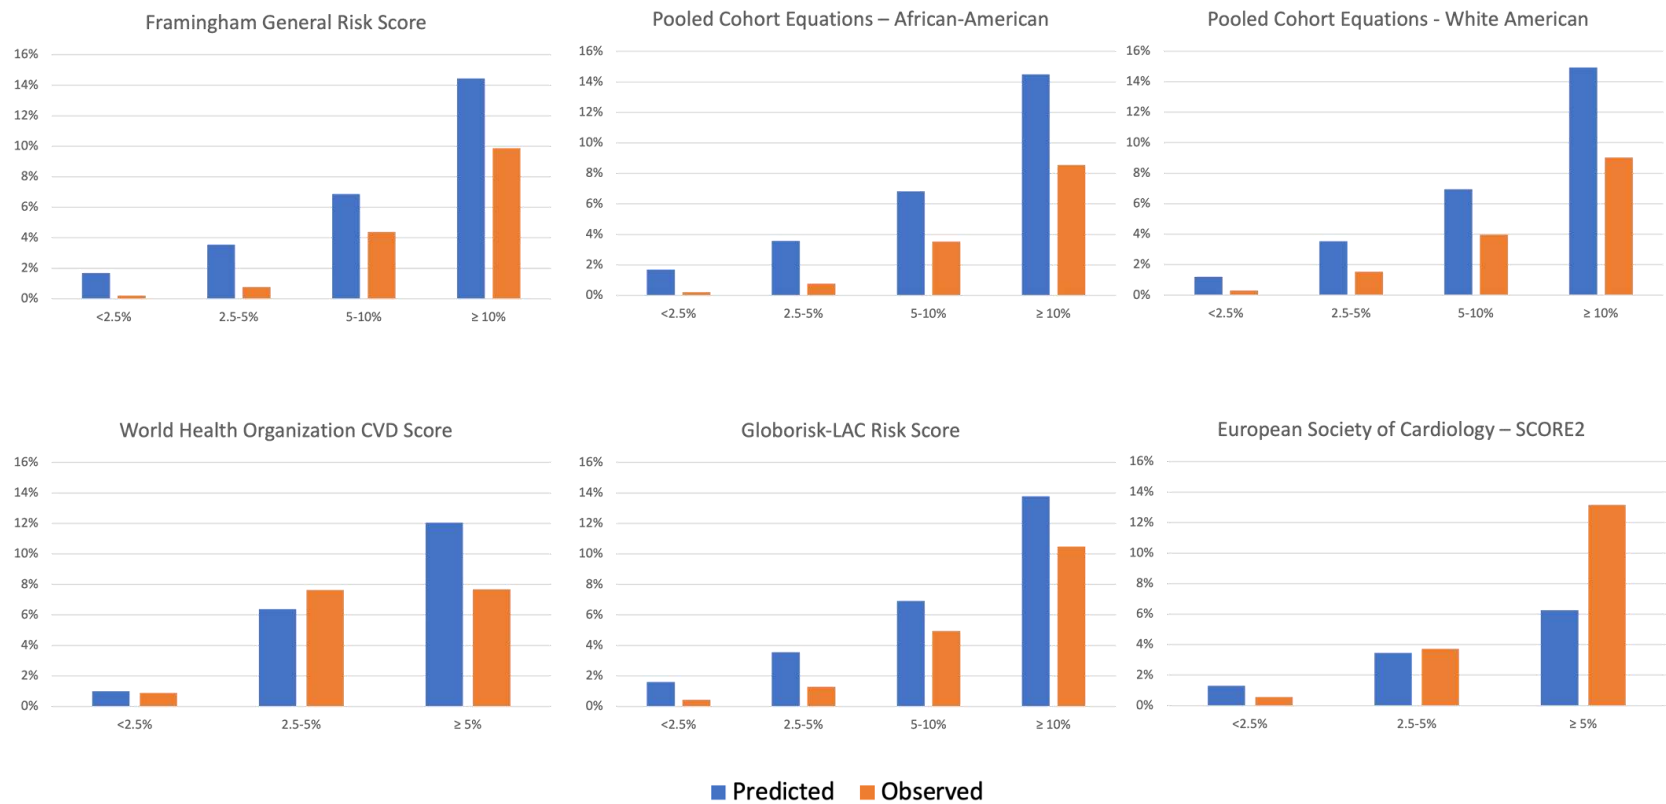

**Supplementary Figure 2: Calibration for the Framingham General Risk, Pooled Cohort Equations, World Health Organization CVD score, Globorisk-LAC and SCORE2 for White men by risk categories. ELSA-Brasil (2008-2013). N=2,868.**

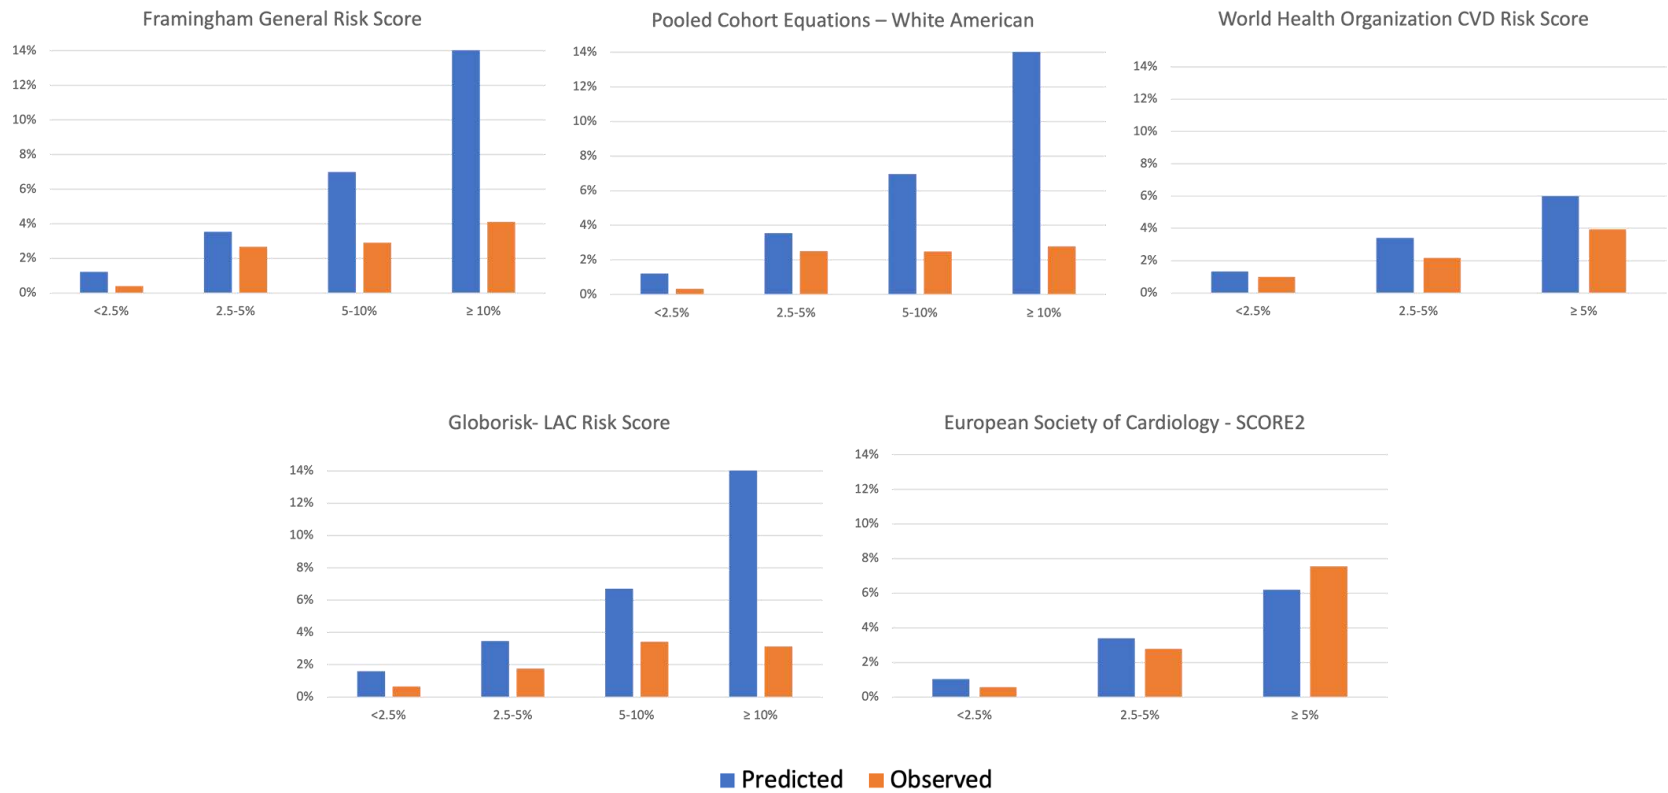

**Supplementary Figure 3: Calibration for the Framingham General Risk, Pooled Cohort Equations, World Health Organization CVD score, Globorisk-LAC and SCORE2 for Black and Pardo women by risk categories. ELSA-Brasil (2008-2013). N=3,016.**

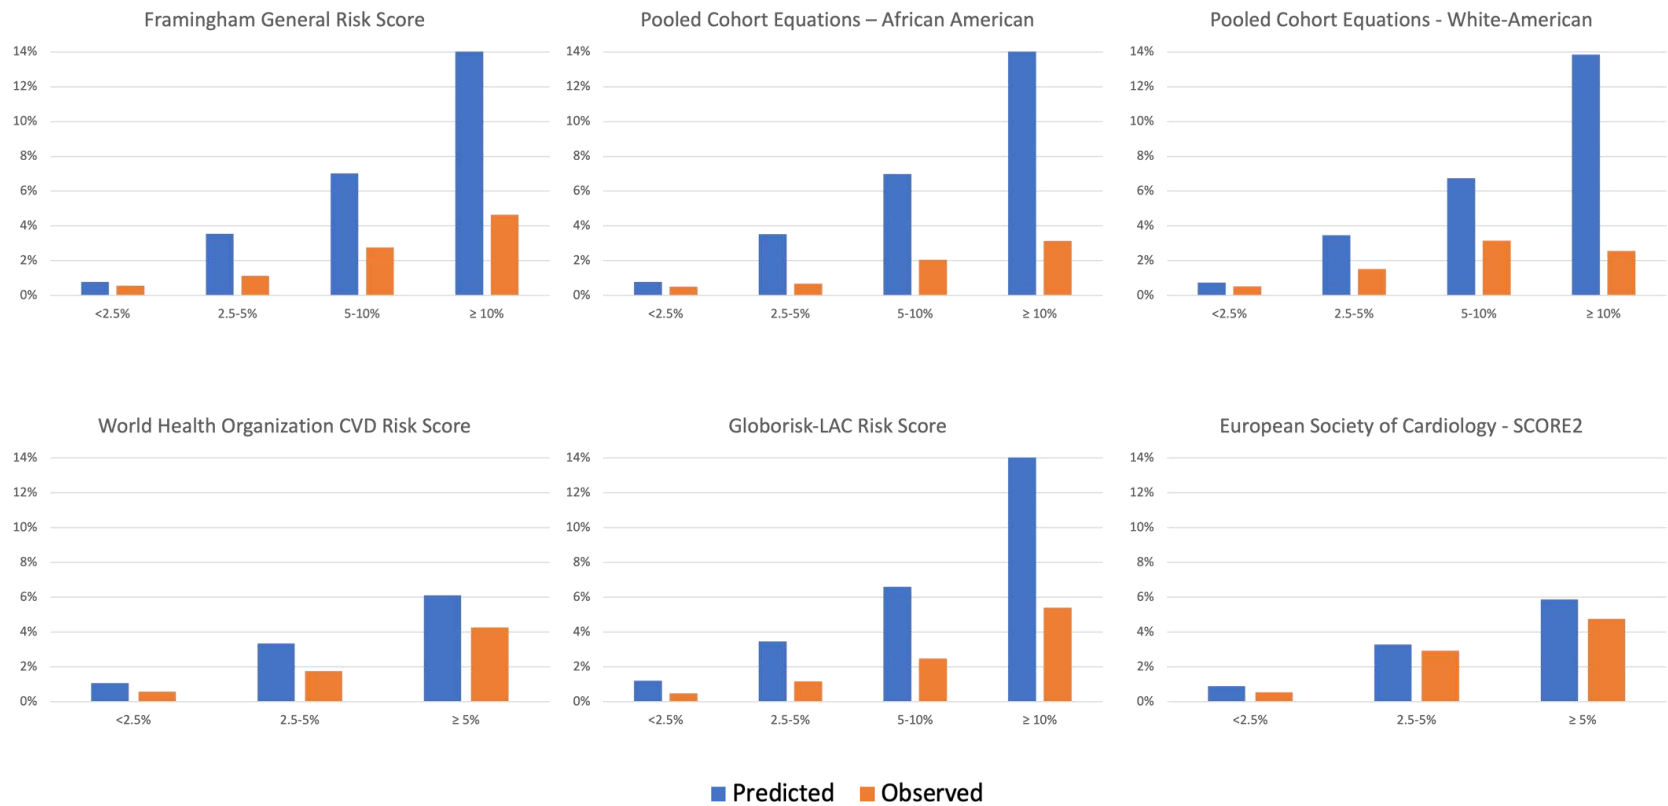

**Supplementary Figure 4: Calibration for the Framingham General Risk, Pooled Cohort Equations, World Health Organization CVD score, Globorisk-LAC and SCORE2 for White women by risk categories. ELSA-Brasil (2008-2013). N= 3,460.**

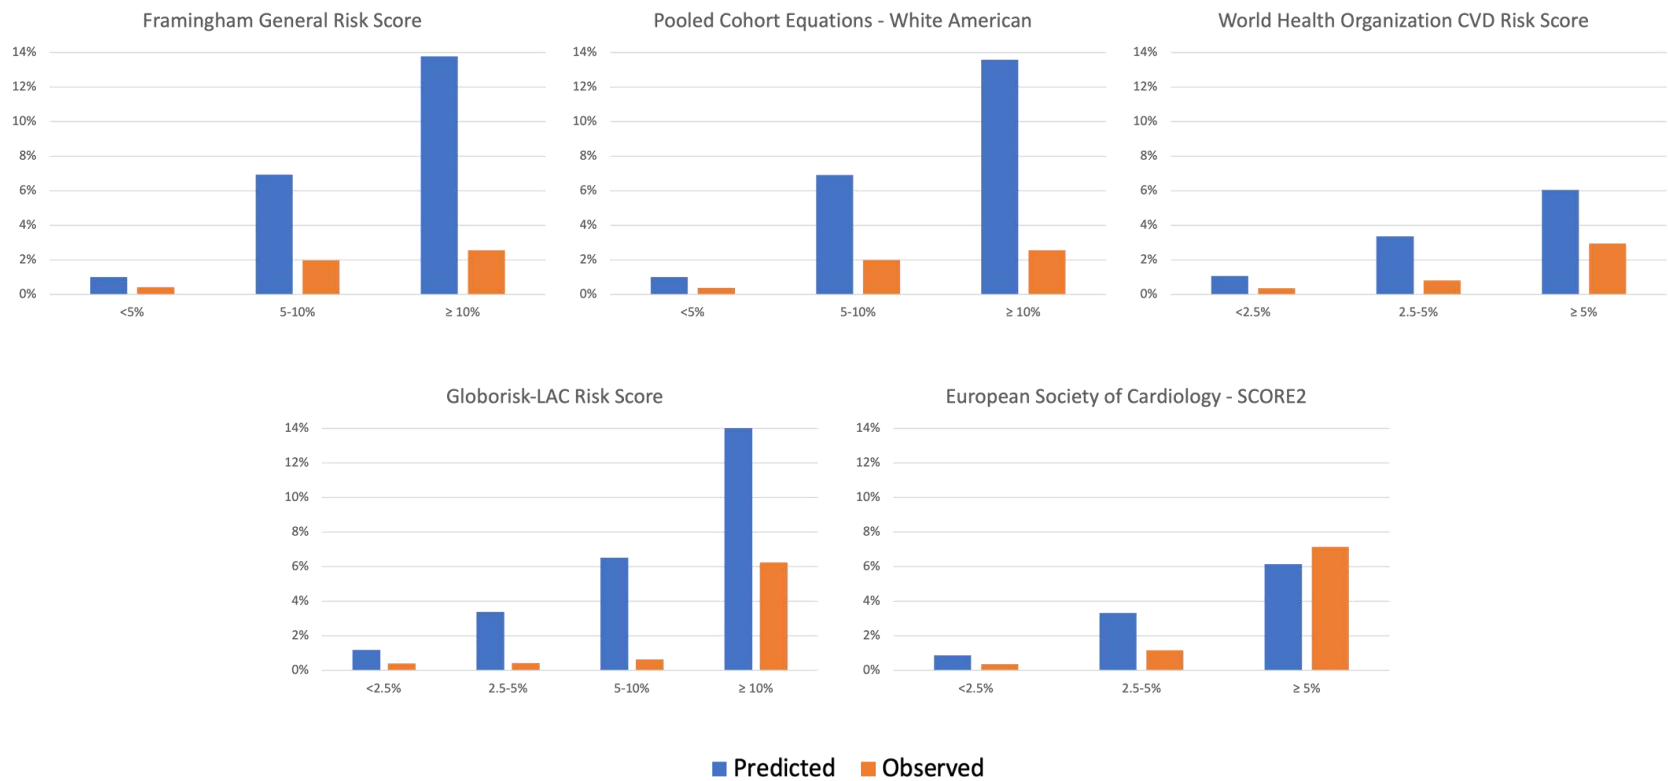

**Supplementary Figure 5: Calibration of PCE-African American vs. PCE White-American equations for Black/”Pardo” men and women. ELSA-Brasil (2008-2013)**

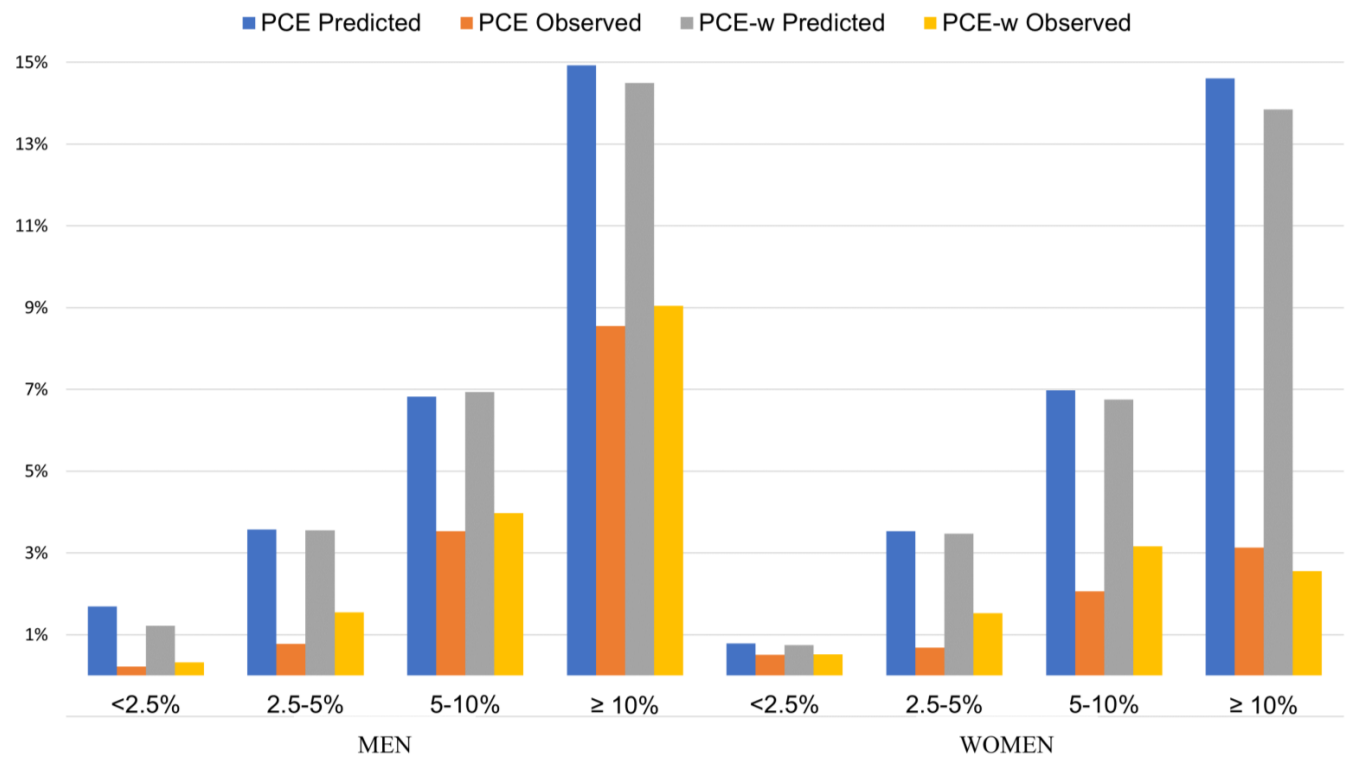

PCE: Pooled Cohort Equations. PCE-w: Pooled Cohort Equations White-American.
